# Supplementary material
Source: PubMed Central journal article supplement (PMC9245089)
Supplement: NIHMS1811882-supplement-Supplementary_Table_1.pdf [file NIHMS1811882-supplement-Supplementary_Table_1.pdf]

| Case # | ALK   | Gender | Age | Stage  | Nuclear p52 |                |                                                                   |                                       | p-STAT3   |                |                                                                     |                                       |
|--------|-------|--------|-----|--------|-------------|----------------|-------------------------------------------------------------------|---------------------------------------|-----------|----------------|---------------------------------------------------------------------|---------------------------------------|
|        |       |        |     |        | Intensity   | Percentage (%) | Percentage Stage (0%=0; <5%=1; >5%, <10%=2; >10%, <25%=3; >25%=4) | H score: intensity X percentage stage | Intensity | Percentage (%) | Percentage Stage (0%=0; <10%=1; >10%, <50%=2; >50%, <75%=3; >75%=4) | H score: intensity X percentage stage |
| #1     | ALK - | F      | 50  | N/A    | 3           | 40%            | 4                                                                 | 12                                    | 3         | 15%            | 2                                                                   | 6                                     |
| #2     | ALK - | M      | 49  | IV     | 3           | 70%            | 4                                                                 | 12                                    | 3         | 15%            | 2                                                                   | 6                                     |
| #3     | ALK - | F      | 64  | N/A    | 2           | 25%            | 3                                                                 | 6                                     | 2         | 75%            | 3                                                                   | 6                                     |
| #4     | ALK - | M      | 75  | IV     | 2           | 25%            | 3                                                                 | 6                                     | 2         | 30%            | 2                                                                   | 4                                     |
| #5     | ALK - | F      | 59  | II-A   | 2           | 20%            | 3                                                                 | 6                                     | 2         | 10%            | 1                                                                   | 2                                     |
| #6     | ALK - | M      | 74  | IV-AE  | 1           | 40%            | 4                                                                 | 4                                     | 2         | 75%            | 3                                                                   | 6                                     |
| #7     | ALK - | F      | 26  | N/A    | 1           | 30%            | 4                                                                 | 4                                     | 2         | 10%            | 1                                                                   | 2                                     |
| #8     | ALK - | M      | 46  | IV     | 1           | 70%            | 4                                                                 | 4                                     | 2         | 15%            | 2                                                                   | 2                                     |
| #9     | ALK - | M      | 36  | IV     | 1           | 15%            | 3                                                                 | 3                                     | 2         | 5%             | 1                                                                   | 2                                     |
| #10    | ALK - | M      | 60  | IV-A   | 1           | 15%            | 3                                                                 | 3                                     | 2         | 5%             | 1                                                                   | 2                                     |
| #11    | ALK - | M      | 49  | IV     | 1           | 20%            | 3                                                                 | 3                                     | 2         | 5%             | 1                                                                   | 2                                     |
| #12    | ALK - | M      | 52  | II-A   | 2           | 5%             | 1                                                                 | 2                                     | 2         | 30%            | 2                                                                   | 4                                     |
| #13    | ALK - | F      | 61  | II-A   | 2           | 5%             | 1                                                                 | 2                                     | 2         | 10%            | 1                                                                   | 2                                     |
| #14    | ALK - | M      | 46  | IV     | 2           | 5%             | 1                                                                 | 2                                     | 1         | 2%             | 1                                                                   | 1                                     |
| #15    | ALK - | M      | 53  | II-A   | 2           | 5%             | 1                                                                 | 2                                     | 1         | 10%            | 1                                                                   | 1                                     |
| #16    | ALK - | M      | 25  | II-B   | 1           | 5%             | 1                                                                 | 1                                     | 1         | 60%            | 3                                                                   | 3                                     |
| #17    | ALK - | M      | 52  | II-A   | 1           | 5%             | 1                                                                 | 1                                     | 1         | 10%            | 1                                                                   | 1                                     |
|        |       |        |     |        |             |                |                                                                   |                                       |           |                |                                                                     |                                       |
| #18    | ALK+  | M      | 33  | III-EA | 2           | 40%            | 4                                                                 | 8                                     | 3         | 90%            | 4                                                                   | 12                                    |
| #19    | ALK+  | F      | 7   | II     | 2           | 15%            | 3                                                                 | 6                                     | 3         | 80%            | 4                                                                   | 12                                    |
| #20    | ALK+  | F      | 39  | II-B   | 2           | 20%            | 3                                                                 | 6                                     | 2         | 85%            | 4                                                                   | 8                                     |
| #21    | ALK+  | F      | 39  | II-B   | 2           | 15%            | 3                                                                 | 6                                     | 2         | 60%            | 3                                                                   | 6                                     |

|     |      |   |    |       |   |     |   |   |   |     |   |   |
|-----|------|---|----|-------|---|-----|---|---|---|-----|---|---|
| #22 | ALK+ | M | 23 | III-B | 1 | 30% | 4 | 4 | 2 | 95% | 4 | 8 |
| #23 | ALK+ | M | 17 | IV-A  | 2 | 10% | 2 | 4 | 2 | 60% | 3 | 6 |
| #24 | ALK+ | M | 58 | II-A  | 2 | 10% | 2 | 4 | 2 | 40% | 2 | 4 |
| #25 | ALK+ | F | 10 | III-B | 2 | 10% | 2 | 4 | 1 | 60% | 3 | 3 |
| #26 | ALK+ | M | 15 | IV    | 2 | 10% | 2 | 4 | 2 | 15% | 2 | 4 |
| #27 | ALK+ | F | 36 | N/A   | 2 | 5%  | 2 | 4 | 2 | 50% | 2 | 4 |
| #28 | ALK+ | M | 18 | II    | 2 | 10% | 2 | 4 | 2 | 50% | 2 | 4 |
| #29 | ALK+ | M | 38 | III-A | 1 | 15% | 3 | 3 | 3 | 70% | 3 | 9 |
| #30 | ALK+ | F | 21 | IV    | 1 | 10% | 2 | 2 | 2 | 50% | 2 | 4 |
| #31 | ALK+ | M | 27 | N/A   | 2 | 2%  | 1 | 2 | 2 | 10% | 1 | 2 |
| #32 | ALK+ | M | 36 | IV    | 1 | 1%  | 1 | 1 | 2 | 70% | 3 | 6 |
| #33 | ALK+ | M | 20 | IV-A  | 0 | 0%  | 0 | 0 | 2 | 70% | 3 | 6 |
| #34 | ALK+ | F | 14 | IV    | 0 | 0%  | 0 | 0 | 1 | 20% | 2 | 2 |
| #35 | ALK+ | F | 20 | I-A   | 0 | 0%  | 0 | 0 | 2 | 50% | 2 | 4 |

**Supplementary Table 1: IHC score (H score) of nuclear p52 and p-STAT3 in primary ALCL cases.**

Intensity of staining was evaluated according to the following scale: 0, no staining; 1, weak staining; 2, moderate staining; and 3, strong staining. The percentage score was determined according to the proportion of tumor cells found to express nuclear p52 (0%=0; <5%=1; >5, <10=2; >10, <25=3; >25=4) or p-STAT3 (0%=0; <10%=1; >10, <50=2; >50, <75=3; >75=4), and then multiplied by the staining intensity score to obtain a final semi quantitative H score.
